# Supplementary material for: Inhibition of Non-Small Cell Lung Cancer Cells by Oxy210, an Oxysterol-Derivative that Antagonizes TGFβ and Hedgehog Signaling
Source: Cells. 2019 Oct 22;8(10):1297. doi: 10.3390/cells8101297 (PMC6829886; doi:10.3390/cells8101297)
Supplement: Supplementary file 1 [file cells-08-01297-s001.zip › Figure 4b and 7 IC 50 determinations.xlsx]

## Sheet: Sheet1
	Exhibit A - Estimates of IC10, IC50 and IC90							logistic curve model													23 Sept 2019
		SE = standard error								original scale
	dataset 1- Fig 4b - original scale Y
				95% confidence bounds
	dose level	Estimate	SE	Lower	Upper		R square
	IC10	0.33455	0.105678	0.169913	0.658709		0.96633
	IC 50	1.82752	0.212539	1.42408	2.34526
	IC90	5.50036	0.687799	4.20643	7.1923
	max Y	16.3864
	min Y	0
	dataset 2- Fig 7a - log 10 scale Y- better r square
				95% confidence bounds						log 10 scale											original scale
	dose level	Estimate	SE	Lower	Upper		R square
	IC10	2.60899	0.468123	1.77559	3.83357		0.985191
	IC 50	4.23367	0.226051	3.77557	4.74735
	IC90	6.87007	0.804035	5.345	8.8303
		original	log
	max Y	381.409	2.58139
	min Y	7.34007	0.8657
	dataset 2- Fig 7a - original scale Y
				95% confidence bounds
	dose level	Estimate	SE	Lower	Upper		R square
	IC10	1.92264	0.237961	1.47155	2.51201		0.946
	IC 50	2.62863	1.01148	1.14473	6.03611
	IC90	4.18163	1.97411	1.50804	11.5952
		original
	max Y	385.02
	min Y	7.2233
										log 10 scale											original scale
	dataset 3- Fig 7b - log 10 scale Y - better r square
				95% confidence bounds
	dose level	Estimate	SE	Lower	Upper		R square
	IC10	1.8873	0.158674	1.5759	2.26023		0.991841
	IC 50	2.52091	0.835956	1.23787	5.13382
	IC90	3.36724	2.49833	0.685758	16.534
		original	log
	max Y	113.449	2.0548
	min Y	0.994142	-0.0025514
	dataset 3- Fig 7b - original scale Y
				95% confidence bounds
	dose level	Estimate	SE	Lower	Upper		R square
	IC10	0.421079	0.190587	0.159502	1.11163		0.907756
	IC 50	1.6638	0.250856	1.20409	2.29901
	IC90	4.09381	0.828298	2.65255	6.31817
		original
	max Y	130.986
	min Y	0
										original scale
	dataset 4.2- Fig 7c - CP+Oxy210- original scale Y
				95% confidence bounds
	dose level	Estimate	SE	Lower	Upper		R square
	IC10	0.0277711	0.0197804	0.00636341	0.121198		0.9173
	IC 50	1.56222	0.368356	0.959194	2.54435
	IC90	24.1466	6.53797	13.7912	42.2775
	max Y	197.73
	min Y	10
	dataset 4.1- Fig 7c - CP- original scale Y
				95% confidence bounds
	dose level	Estimate	SE	Lower	Upper		R square
	IC10	0.659065	0.279716	0.273926	1.58571		0.9299
	IC 50	6.72051	0.717261	5.38912	8.38082
	IC90	40.6874	18.2336	16.1008	102.819
	max Y	199.732
	min Y	5	<- fixed at 5
