# Supplementary material for: Inhibition of Non-Small Cell Lung Cancer Cells by Oxy210, an Oxysterol-Derivative that Antagonizes TGFβ and Hedgehog Signaling
Source: Cells. 2019 Oct 22;8(10):1297. doi: 10.3390/cells8101297 (PMC6829886; doi:10.3390/cells8101297)
Supplement: Supplementary file 1 [file cells-08-01297-s001.zip › Figure 11a densitometry readings.xlsx]

## Sheet: Sheet1
Lane #	pSMAD2	SMAD2	HSC70	pSMAD2/SMAD2	pSMAD2/HSC70
1	0	201.938	234.479	0	0
2	216.87	198.408	226.516	1.09305	0.957416
3	182.492	195.326	230.848	0.934294	0.790529
4	195.844	186.137	201.532	1.05215	0.971776
5	0	185.465	206.739	0	0
6	174.164	187.706	201.882	0.927855	0.862702
7	186.484	182.887	218.421	1.01967	0.853782
8	152.277	183.336	211.421	0.83059	0.720255
9	0	177.452	194.619	0	0
10	10.874	176.5	209.758	0.0616091	0.0518407
11	59.19	180.478	195.844	0.327962	0.30223
12	20.785	168.991	235.354	0.122995	0.0883138
Lane #	pSMAD3	SMAD3	HSC70	pSMAD3/SMAD3	pSMAD3/HSC70
1	0	211.054	234.479	0	0
2	195.842	240.298	226.516	0.814996	0.864584
3	196.821	223.061	230.848	0.882364	0.8526
4	171.7	224.091	201.532	0.766207	0.851974
5	0	204.951	206.739	0	0
6	145.328	225.597	201.882	0.644193	0.719866
7	150.089	236.534	218.421	0.634535	0.687155
8	140.095	225.082	211.421	0.622418	0.662635
9	0	228.252	194.619	0	0
10	12.899	206.298	209.758	0.0625261	0.0614947
11	49.974	223.655	195.844	0.223442	0.255172
12	18.402	221.238	235.354	0.0831774	0.0781886

## Sheet: SMAD2
Lane #	pSMAD2/SMAD2
1	0
2	1.09305
3	0.934294
4	1.05215
5	0
6	0.927855
7	1.01967
8	0.83059
9	0
10	0.0616091
11	0.327962
12	0.122995
Lane #	pSMAD2/HSC70
1	0
2	0.957416
3	0.790529
4	0.971776
5	0
6	0.862702
7	0.853782
8	0.720255
9	0
10	0.0518407
11	0.30223
12	0.0883138

## Sheet: SMAD3
Lane #	pSMAD3/SMAD3
1	0
2	0.814996
3	0.882364
4	0.766207
5	0
6	0.644193
7	0.634535
8	0.622418
9	0
10	0.0625261
11	0.223442
12	0.0831774
Lane #	pSMAD3/HSC70
1	0
2	0.864584
3	0.8526
4	0.851974
5	0
6	0.719866
7	0.687155
8	0.662635
9	0
10	0.0614947
11	0.255172
12	0.0781886
